# Supplementary material for: Estimated Carbon Emissions Savings With Shifts From In-Person Visits to Telemedicine for Patients With Cancer
Source: PubMed Central journal article supplement (PMC9890284; doi:10.1001/jamanetworkopen.2022.53788), 2023-01-31
Supplement: jamanetwopen-e2253788-s001.pdf [file jamanetwopen-e2253788-s001.pdf]

## Supplemental Online Content

Patel KB, Gonzalez BD, Turner K, et al. Estimated carbon emissions savings with shifts from in-person visits to telemedicine for patients with cancer. *JAMA Netw Open*. 2023;6(1):e2253788. doi:10.1001/jamanetworkopen.2022.53788

**eTable 1.** CO<sub>2</sub> Emission Savings and Equivalencies From Reduced Emissions Due to Telemedicine for Patients Driving  $\leq 60$  Minutes and  $>60$  Minutes One-Way

**eTable 2.** Number of Cancellations/No Shows for In-person and Telemedicine Visits

**eFigure 1.** Representation of Number and Percentage of Patients and Their Drive Times to Moffitt Cancer Center From April 1, 2020, to June 30, 2021

**eFigure 2.** CO<sub>2</sub> Emissions Saved From Telemedicine Visits

**eFigure 3.** Weekly Public Transit Ridership in Hillsborough Area from December 19, 2019, to August 13, 2022

This supplemental material has been provided by the authors to give readers additional information about their work.

**eTable 1.** CO<sub>2</sub> Emission Savings and Equivalencies From Reduced Emissions Due to Telemedicine for Patients Driving ≤60 Minutes and >60 Minutes One Way

CO<sub>2</sub> emission of 411 g/mile was considered midpoint. Estimates corresponding to lower limit (386 g/mile) and upper limit (435 g/mile) are provided as reference.

|                                                 | Estimates with g/mile CO <sub>2</sub> emissions                                                                            | Driving time ≤ 60 minutes         |                                  |                                  | Driving time > 60 minutes              |                                    |                                     |
|-------------------------------------------------|----------------------------------------------------------------------------------------------------------------------------|-----------------------------------|----------------------------------|----------------------------------|----------------------------------------|------------------------------------|-------------------------------------|
|                                                 |                                                                                                                            | 386 g/mile                        | 411 g/mile                       | 435 g/mile                       | 386 g/mile                             | 411 g/mile                         | 435 g/mile                          |
|                                                 | <b>Number of patients</b>                                                                                                  | 10 027                            |                                  |                                  | 13 201                                 |                                    |                                     |
|                                                 | <b>Number of visits</b>                                                                                                    | 21 489                            |                                  |                                  | 27 840                                 |                                    |                                     |
|                                                 | <b>Total miles saved<sup>a</sup></b>                                                                                       | 1 032 775                         |                                  |                                  | 6 677 002                              |                                    |                                     |
|                                                 | <b>Miles saved per visit<sup>a</sup></b><br>Mean (SD)<br>Median (25 <sup>th</sup> – 75 <sup>th</sup> percentile)           | 48.1 (22.8)<br>49.0 (30.0 – 65.0) |                                  |                                  | 239.8 (133.3)<br>204.0 (148.0 – 302.0) |                                    |                                     |
|                                                 | <b>Total CO<sub>2</sub> kg emissions saved</b>                                                                             | 398 651                           | 424 471                          | 449 257                          | 2 577 323                              | 2 744 248                          | 2 904 496                           |
|                                                 | <b>CO<sub>2</sub> kg emissions saved per visit</b><br>Mean (SD)<br>Median (25 <sup>th</sup> – 75 <sup>th</sup> percentile) | 18.6 (8.8)<br>18.9 (11.6 – 25.1)  | 19.8 (9.4)<br>20.1 (12.3 – 26.7) | 20.9 (9.9)<br>21.3 (13.1 – 28.3) | 92.6 (51.5)<br>78.7 (57.1 – 116.6)     | 98.6 (54.8)<br>83.8 (60.8 – 124.1) | 104.3 (58.0)<br>88.7 (64.4 – 131.4) |
| <b>Equivalent greenhouse gas emissions from</b> | <b>Passenger vehicles driven for one year</b>                                                                              | 85.9                              | 91.5                             | 96.8                             | 555                                    | 591                                | 626                                 |
| <b>Equivalent CO<sub>2</sub> emissions from</b> | <b>Gallons of gasoline consumed</b>                                                                                        | 44 858                            | 47 763                           | 50 552                           | 290 010                                | 308 794                            | 7 209 556                           |
|                                                 | <b>Homes' electricity use for one year</b>                                                                                 | 77.6                              | 82.6                             | 87.4                             | 501                                    | 534                                | 565                                 |
|                                                 | <b>Homes' energy use for one year</b>                                                                                      | 50.2                              | 53.5                             | 56.6                             | 325                                    | 346                                | 366                                 |
| <b>Equivalent carbon sequestered by</b>         | <b>Tree seedlings grown for 10 years</b>                                                                                   | 6 592                             | 7 019                            | 7 429                            | 42 616                                 | 45 376                             | 48 026                              |
|                                                 | <b>Acres of U.S. forests in one year</b>                                                                                   | 472                               | 502                              | 532                              | 3 050                                  | 3 248                              | 3 437                               |

a: round trip

**eTable 2.** Number of Cancellations/No Shows for In-person and Telemedicine Visits

April 1, 2018 – Jun 30, 2019 was deemed to be reference period compared to the study period of April 1, 2020 – Jun 30, 2021. Percent In-person/no-show cancellation were determined to be (number of cancellations or no-shows) / (completed visits + cancellation or no-shows).

|                                                             | April 1, 2018 – Jun 30, 2019 | April 1, 2020 – Jun 30, 2021 |
|-------------------------------------------------------------|------------------------------|------------------------------|
| Number of total visits                                      | 304,650                      | 350,782                      |
| Number (%) of total cancellations/no-shows                  | 95,582 (23.9%)               | 119,408 (25.2%)              |
| In-person visits                                            | 304,650                      | 301,453                      |
| Number (%) of in-person cancellation/no-shows cancellations | 95,582 (23.9%)               | 103,834 (25.6%)              |
| Number (%) of telemedicine visits                           | Not offered                  | 49,329                       |
| Number (%) of telemedicine cancellation/no-shows            | N/A                          | 15,574 (24.0%)               |

**eFigure 1.** Representation of Number and Percentage of Patients and Their Drive Times to Moffitt Cancer Center From April 1, 2020, to June 30, 2021

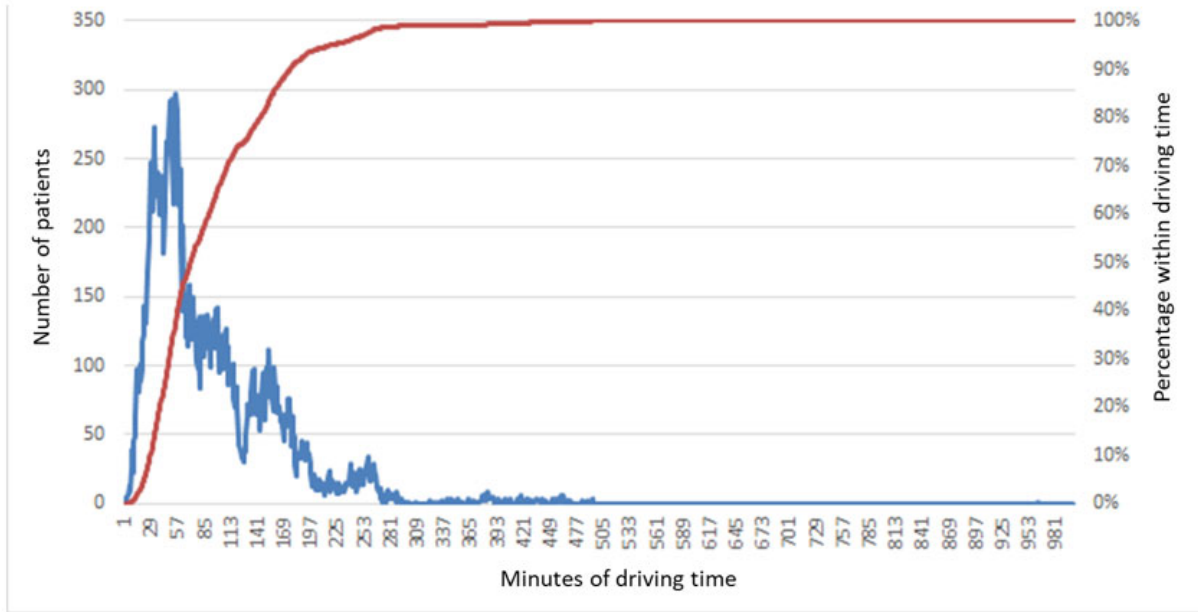

Note: The blue line represents number of patients within certain drive time from Moffitt Cancer Center (MCC). The orange line represents the percentage of patients that are within any given driving time or less. For example, 60% of patients come from 97 minutes or closer. The highest number of patients on a per minute basis occurs within 60 minutes of the facility. This can be noticed both by the high peaks on the blue line and by the steep slope of the orange line.

**eFigure 2.** CO<sub>2</sub> Emissions Saved From Telemedicine Visits

**Suppl Fig 1:** CO<sub>2</sub> emissions saved from telemedicine visits. (A) For patients with driving time ≤ 60 minutes, 10,069 patients had 21,548 visits, which saved 424,471 kg CO<sub>2</sub> emissions (per-visit average savings of 48.1 miles and 19.8 CO<sub>2</sub> kg emissions). (B) For patients with driving time > 60 minutes, 13,232 patients had 27,893 visits, which saved 2,744,248 kg CO<sub>2</sub> emissions (per-visit average savings of 239.8 miles and 98.6 CO<sub>2</sub> kg emissions).

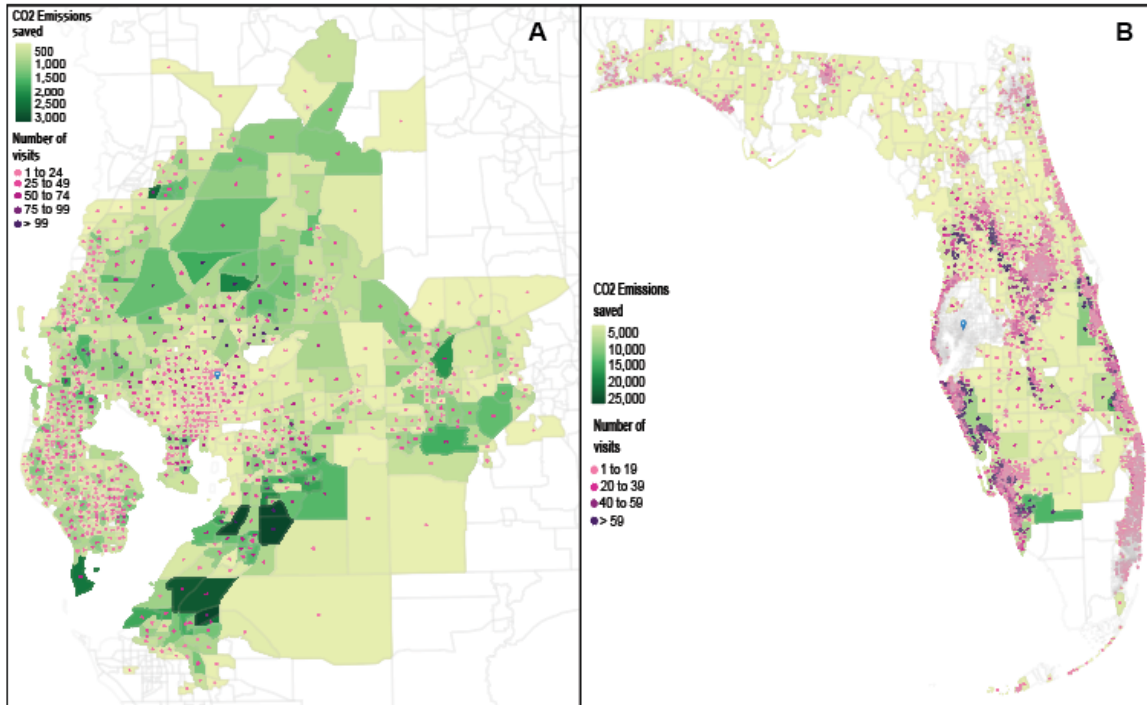

Note: Blue marker represents Moffitt Cancer Center. Geographical boundaries represent census tracts. Census tract centroids were used to map the number of visits per tract. Census tract color represents CO<sub>2</sub> emissions saved, and dot color represents the number of telemedicine visits.

**eFigure 3.** Weekly Public Transit Ridership in Hillsborough Area from December 19, 2019, to August 13, 2022

**Supplementary Figure 3:** Weekly public transit ridership in Hillsborough Area from Dec 19, 2019 to Aug 13, 2022. Public ridership continues to be below pre-pandemic levels. The percentages displayed in the figure represent the percent difference between actual pre-pandemic ridership and estimated ridership for a given period during the pandemic. At the start of the study period (April 1, 2020) public transit ridership was 31%, at the end of the study period (Jun 30, 2021) ridership was 64% and in Aug 7, 2022 it was 85% of pre-pandemic levels.

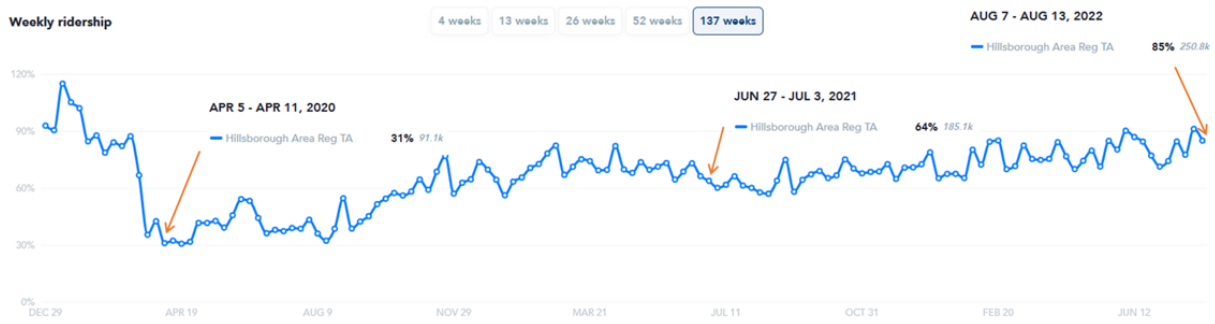

Source: <https://transitapp.com/apta>
