# Supplementary material for: Estimated Carbon Emissions Savings With Shifts From In-Person Visits to Telemedicine for Patients With Cancer
Source: PubMed Central journal article supplement (PMC9890284; doi:10.1001/jamanetworkopen.2022.53788), 2023-01-31
Supplement: jamanetwopen-e2253788-s002.pdf [file jamanetwopen-e2253788-s002.pdf]

## Data Sharing Statement

Patel. Estimated Carbon Emissions Savings With Shifts From In-Person Visits to Telemedicine for Patients With Cancer. *JAMA Netw Open*. Published January 31, 2023.

doi:10.1001/jamanetworkopen.2022.53788

### Data

**Data available:** Yes

**Data types:** Deidentified participant data

**How to access data:** [krupal.patel@moffitt.org](mailto:krupal.patel@moffitt.org)

**When available:** With publication

### Supporting Documents

**Document types:** None

### Additional Information

**Who can access the data:** Researchers whose proposed use of the data has been approved

**Types of analyses:** For specified purpose

**Mechanisms of data availability:** after approval of a proposal and with a signed data access agreement
